# Supplementary material for: Training-Associated Alterations In Equine Respiratory Immunity – A Multi-Omics Comparative Approach.
Source: Research Square preprint supplement (doi:10.21203/rs.3.rs-770868/v1), 2021-08-05
Supplement: Supplementary file 1 [file a6aa6c89ae07017ba60381f4.xlsx]

## Sheet: BP_DIRECT_UP
The Database for Annotation, Visualization and Integrated Discovery	DAVID Bioinformatics Resources 6.8
	Laboratory of Human Retrovirology and Immunoinformatics (LHRI)
*** Welcome to DAVID 6.8 ***
*** If you are looking for DAVID 6.7, please visit our development site. ***
Functional Annotation Chart
Current Gene List: List_1
Current Background: Equus caballus
773 DAVID IDs	Upregulated Genes
Options
58 chart records
Sublist	Category	Term	RT	Genes	Count	%	P-Value	Benjamini
	GOTERM_BP_DIRECT	translation	RT		48	6.2	8.8e-24	1.3e-20
	GOTERM_BP_DIRECT	ribosomal small subunit assembly	RT		11	1.4	2.4e-10	1.7e-07
	GOTERM_BP_DIRECT	antigen processing and presentation of peptide or polysaccharide antigen via MHC class II	RT		6	0.8	0.00011	0.055
	GOTERM_BP_DIRECT	proteolysis involved in cellular protein catabolic process	RT		9	1.2	0.00028	0.099
	GOTERM_BP_DIRECT	ER to Golgi vesicle-mediated transport	RT		11	1.4	0.00031	0.089
	GOTERM_BP_DIRECT	negative regulation of viral genome replication	RT		7	0.9	0.00034	0.08
	GOTERM_BP_DIRECT	maturation of SSU-rRNA from tricistronic rRNA transcript (SSU-rRNA, 5.8S rRNA, LSU-rRNA)	RT		8	1	0.00037	0.076
	GOTERM_BP_DIRECT	ribosomal large subunit assembly	RT		6	0.8	0.0016	0.26
	GOTERM_BP_DIRECT	response to virus	RT		8	1	0.0046	0.53
	GOTERM_BP_DIRECT	negative regulation of protein ubiquitination	RT		7	0.9	0.0047	0.5
	GOTERM_BP_DIRECT	mitochondrial respiratory chain complex I assembly	RT		5	0.6	0.0072	0.62
	GOTERM_BP_DIRECT	heme catabolic process	RT		3	0.4	0.0074	0.6
	GOTERM_BP_DIRECT	regulation of interferon-gamma production	RT		3	0.4	0.0074	0.6
	GOTERM_BP_DIRECT	DNA deamination	RT		3	0.4	0.0074	0.6
	GOTERM_BP_DIRECT	mitochondrial electron transport, NADH to ubiquinone	RT		4	0.5	0.012	0.74
	GOTERM_BP_DIRECT	cytoplasmic translation	RT		5	0.6	0.014	0.76
	GOTERM_BP_DIRECT	polyadenylation-dependent snoRNA 3'-end processing	RT		3	0.4	0.014	0.76
	GOTERM_BP_DIRECT	maturation of SSU-rRNA	RT		4	0.5	0.016	0.77
	GOTERM_BP_DIRECT	rRNA base methylation	RT		3	0.4	0.023	0.87
	GOTERM_BP_DIRECT	cell redox homeostasis	RT		8	1	0.024	0.86
	GOTERM_BP_DIRECT	release of cytochrome c from mitochondria	RT		4	0.5	0.025	0.86
	GOTERM_BP_DIRECT	defense response to virus	RT		10	1.3	0.031	0.9
	GOTERM_BP_DIRECT	rRNA processing	RT		6	0.8	0.033	0.91
	GOTERM_BP_DIRECT	ganglioside catabolic process	RT		3	0.4	0.033	0.9
	GOTERM_BP_DIRECT	mitochondrial respiratory chain complex IV assembly	RT		3	0.4	0.033	0.9
	GOTERM_BP_DIRECT	maturation of LSU-rRNA	RT		4	0.5	0.037	0.91
	GOTERM_BP_DIRECT	monocyte chemotaxis	RT		5	0.6	0.045	0.94
	GOTERM_BP_DIRECT	U4 snRNA 3'-end processing	RT		3	0.4	0.045	0.94
	GOTERM_BP_DIRECT	cellular response to arsenic-containing substance	RT		3	0.4	0.045	0.94
	GOTERM_BP_DIRECT	protein destabilization	RT		5	0.6	0.05	0.95
	GOTERM_BP_DIRECT	nuclear-transcribed mRNA catabolic process, exonucleolytic, 3'-5'	RT		3	0.4	0.058	0.96
	GOTERM_BP_DIRECT	chaperone mediated protein folding requiring cofactor	RT		3	0.4	0.058	0.96
	GOTERM_BP_DIRECT	neutrophil chemotaxis	RT		6	0.8	0.059	0.96
	GOTERM_BP_DIRECT	positive regulation of intrinsic apoptotic signaling pathway	RT		4	0.5	0.059	0.96
	GOTERM_BP_DIRECT	ribosomal large subunit biogenesis	RT		4	0.5	0.059	0.96
	GOTERM_BP_DIRECT	ATP synthesis coupled proton transport	RT		4	0.5	0.068	0.97
	GOTERM_BP_DIRECT	lymphocyte chemotaxis	RT		4	0.5	0.068	0.97
	GOTERM_BP_DIRECT	immune response	RT		15	1.9	0.071	0.97
	GOTERM_BP_DIRECT	regulation of protein catabolic process	RT		3	0.4	0.072	0.97
	GOTERM_BP_DIRECT	peroxisome fission	RT		3	0.4	0.072	0.97
	GOTERM_BP_DIRECT	response to biotic stimulus	RT		3	0.4	0.072	0.97
	GOTERM_BP_DIRECT	acyl-CoA metabolic process	RT		3	0.4	0.072	0.97
	GOTERM_BP_DIRECT	spliceosomal snRNP assembly	RT		4	0.5	0.077	0.97
	GOTERM_BP_DIRECT	cellular response to interferon-gamma	RT		5	0.6	0.082	0.98
	GOTERM_BP_DIRECT	protein folding	RT		9	1.2	0.083	0.98
	GOTERM_BP_DIRECT	tricarboxylic acid cycle	RT		4	0.5	0.086	0.98
	GOTERM_BP_DIRECT	lipid storage	RT		4	0.5	0.086	0.98
	GOTERM_BP_DIRECT	glycolytic process	RT		4	0.5	0.086	0.98
	GOTERM_BP_DIRECT	regulation of translational initiation	RT		4	0.5	0.086	0.98
	GOTERM_BP_DIRECT	autophagosome assembly	RT		5	0.6	0.098	0.98
	GOTERM_BP_DIRECT	exocytosis	RT		5	0.6	0.098	0.98
	GOTERM_BP_DIRECT	peptidyl-lysine modification to peptidyl-hypusine	RT		2	0.3	0.098	0.98
	GOTERM_BP_DIRECT	heme oxidation	RT		2	0.3	0.098	0.98
	GOTERM_BP_DIRECT	regulation of viral budding via host ESCRT complex	RT		2	0.3	0.098	0.98
	GOTERM_BP_DIRECT	negative regulation of defense response to virus by host	RT		2	0.3	0.098	0.98
	GOTERM_BP_DIRECT	mitochondrial ATP synthesis coupled proton transport	RT		2	0.3	0.098	0.98
	GOTERM_BP_DIRECT	rRNA 3'-end processing	RT		2	0.3	0.098	0.98
	GOTERM_BP_DIRECT	protein insertion into ER membrane	RT		2	0.3	0.098	0.98

## Sheet: Pathway_UP
The Database for Annotation, Visualization and Integrated Discovery	DAVID Bioinformatics Resources 6.8
	Laboratory of Human Retrovirology and Immunoinformatics (LHRI)
*** Welcome to DAVID 6.8 ***
*** If you are looking for DAVID 6.7, please visit our development site. ***
Functional Annotation Chart
Current Gene List: List_1
Current Background: Equus caballus
773 DAVID IDs	Upregulated Genes
Options
38 chart records
Sublist	Category	Term	RT	Genes	Count	%	P-Value	Benjamini
	KEGG_PATHWAY	Ribosome	RT		51	6.6	1.4e-30	3.7e-28
	KEGG_PATHWAY	Huntington's disease	RT		37	4.8	4.1e-12	5.3e-10
	KEGG_PATHWAY	Metabolic pathways	RT		116	15	7.1e-12	6.1e-10
	KEGG_PATHWAY	Oxidative phosphorylation	RT		29	3.8	6e-11	3.8e-09
	KEGG_PATHWAY	Parkinson's disease	RT		28	3.6	1.4e-09	7.2e-08
	KEGG_PATHWAY	Alzheimer's disease	RT		31	4	1.7e-09	7.3e-08
	KEGG_PATHWAY	Proteasome	RT		16	2.1	3.9e-09	1.4e-07
	KEGG_PATHWAY	Non-alcoholic fatty liver disease (NAFLD)	RT		24	3.1	1.9e-06	6.3e-05
	KEGG_PATHWAY	RNA polymerase	RT		10	1.3	1.3e-05	0.00038
	KEGG_PATHWAY	Pyrimidine metabolism	RT		17	2.2	6e-05	0.0015
	KEGG_PATHWAY	Protein processing in endoplasmic reticulum	RT		21	2.7	0.00057	0.013
	KEGG_PATHWAY	Biosynthesis of amino acids	RT		12	1.6	0.0015	0.032
	KEGG_PATHWAY	Antigen processing and presentation	RT		11	1.4	0.002	0.04
	KEGG_PATHWAY	Purine metabolism	RT		20	2.6	0.0027	0.048
	KEGG_PATHWAY	Arginine and proline metabolism	RT		9	1.2	0.0037	0.063
	KEGG_PATHWAY	Porphyrin and chlorophyll metabolism	RT		7	0.9	0.0039	0.061
	KEGG_PATHWAY	Ribosome biogenesis in eukaryotes	RT		11	1.4	0.0087	0.12
	KEGG_PATHWAY	Carbon metabolism	RT		13	1.7	0.012	0.16
	KEGG_PATHWAY	Biosynthesis of antibiotics	RT		20	2.6	0.014	0.18
	KEGG_PATHWAY	Asthma	RT		6	0.8	0.018	0.21
	KEGG_PATHWAY	Graft-versus-host disease	RT		7	0.9	0.019	0.21
	KEGG_PATHWAY	Autoimmune thyroid disease	RT		8	1	0.021	0.22
	KEGG_PATHWAY	Fructose and mannose metabolism	RT		6	0.8	0.024	0.24
	KEGG_PATHWAY	Cardiac muscle contraction	RT		9	1.2	0.025	0.24
	KEGG_PATHWAY	Influenza A	RT		16	2.1	0.031	0.28
	KEGG_PATHWAY	Allograft rejection	RT		7	0.9	0.032	0.28
	KEGG_PATHWAY	Rheumatoid arthritis	RT		10	1.3	0.039	0.31
	KEGG_PATHWAY	Type I diabetes mellitus	RT		7	0.9	0.047	0.36
	KEGG_PATHWAY	Metabolism of xenobiotics by cytochrome P450	RT		7	0.9	0.047	0.36
	KEGG_PATHWAY	Glutathione metabolism	RT		7	0.9	0.047	0.36
	KEGG_PATHWAY	Glyoxylate and dicarboxylate metabolism	RT		5	0.6	0.049	0.36
	KEGG_PATHWAY	Toxoplasmosis	RT		11	1.4	0.053	0.37
	KEGG_PATHWAY	Spliceosome	RT		12	1.6	0.067	0.44
	KEGG_PATHWAY	Drug metabolism - cytochrome P450	RT		6	0.8	0.074	0.46
	KEGG_PATHWAY	Steroid biosynthesis	RT		4	0.5	0.079	0.48
	KEGG_PATHWAY	beta-Alanine metabolism	RT		5	0.6	0.083	0.48
	KEGG_PATHWAY	Lysosome	RT		11	1.4	0.095	0.52
	KEGG_PATHWAY	Chemical carcinogenesis	RT		7	0.9	0.097	0.52
from your list are not in the output.

## Sheet: Pathway_DOWN
The Database for Annotation, Visualization and Integrated Discovery	DAVID Bioinformatics Resources 6.8
	Laboratory of Human Retrovirology and Immunoinformatics (LHRI)
*** Welcome to DAVID 6.8 ***
*** If you are looking for DAVID 6.7, please visit our development site. ***
Functional Annotation Chart
Current Gene List: List_1
Current Background: Equus caballus
774 DAVID IDs	Downregulated Genes
Options
65 chart records	Right-click and select 'Save Target As' to download results Download File
Sublist	Category	Term	RT	Genes	Count	%	P-Value	Benjamini
	KEGG_PATHWAY	Endometrial cancer	RT		10	1.3	7.9e-05	0.017
	KEGG_PATHWAY	Apoptosis	RT		10	1.3	0.00022	0.024
	KEGG_PATHWAY	FoxO signaling pathway	RT		15	1.9	0.00026	0.018
	KEGG_PATHWAY	T cell receptor signaling pathway	RT		13	1.7	0.00026	0.014
	KEGG_PATHWAY	MAPK signaling pathway	RT		21	2.7	0.00059	0.025
	KEGG_PATHWAY	mTOR signaling pathway	RT		9	1.2	0.0011	0.039
	KEGG_PATHWAY	Prostate cancer	RT		11	1.4	0.0012	0.036
	KEGG_PATHWAY	Cell cycle	RT		13	1.7	0.0016	0.042
	KEGG_PATHWAY	TNF signaling pathway	RT		12	1.6	0.0016	0.037
	KEGG_PATHWAY	Natural killer cell mediated cytotoxicity	RT		12	1.6	0.0017	0.036
	KEGG_PATHWAY	Proteoglycans in cancer	RT		17	2.2	0.002	0.038
	KEGG_PATHWAY	Fanconi anemia pathway	RT		8	1	0.0021	0.037
	KEGG_PATHWAY	Glioma	RT		9	1.2	0.0023	0.038
	KEGG_PATHWAY	Fc epsilon RI signaling pathway	RT		9	1.2	0.0026	0.039
	KEGG_PATHWAY	Homologous recombination	RT		6	0.8	0.0031	0.043
	KEGG_PATHWAY	Melanoma	RT		9	1.2	0.0034	0.045
	KEGG_PATHWAY	Non-small cell lung cancer	RT		8	1	0.0036	0.045
	KEGG_PATHWAY	B cell receptor signaling pathway	RT		9	1.2	0.0037	0.044
	KEGG_PATHWAY	Chronic myeloid leukemia	RT		9	1.2	0.0053	0.059
	KEGG_PATHWAY	Oxytocin signaling pathway	RT		13	1.7	0.0065	0.068
	KEGG_PATHWAY	Colorectal cancer	RT		8	1	0.0077	0.076
	KEGG_PATHWAY	Phosphatidylinositol signaling system	RT		10	1.3	0.0086	0.082
	KEGG_PATHWAY	p53 signaling pathway	RT		8	1	0.0091	0.082
	KEGG_PATHWAY	Signaling pathways regulating pluripotency of stem cells	RT		12	1.6	0.0096	0.083
	KEGG_PATHWAY	Small cell lung cancer	RT		9	1.2	0.0097	0.081
	KEGG_PATHWAY	Pathways in cancer	RT		24	3.1	0.0099	0.08
	KEGG_PATHWAY	Non-homologous end-joining	RT		4	0.5	0.01	0.081
	KEGG_PATHWAY	Renal cell carcinoma	RT		8	1	0.011	0.08
	KEGG_PATHWAY	Sphingolipid signaling pathway	RT		11	1.4	0.011	0.077
	KEGG_PATHWAY	Lysine degradation	RT		7	0.9	0.011	0.077
	KEGG_PATHWAY	Jak-STAT signaling pathway	RT		12	1.6	0.011	0.076
	KEGG_PATHWAY	RNA transport	RT		13	1.7	0.013	0.082
	KEGG_PATHWAY	Neurotrophin signaling pathway	RT		11	1.4	0.013	0.085
	KEGG_PATHWAY	Prolactin signaling pathway	RT		8	1	0.013	0.082
	KEGG_PATHWAY	GnRH signaling pathway	RT		9	1.2	0.014	0.082
	KEGG_PATHWAY	Hepatitis B	RT		12	1.6	0.014	0.08
	KEGG_PATHWAY	Endocytosis	RT		17	2.2	0.015	0.083
	KEGG_PATHWAY	Acute myeloid leukemia	RT		7	0.9	0.016	0.086
	KEGG_PATHWAY	mRNA surveillance pathway	RT		9	1.2	0.017	0.088
	KEGG_PATHWAY	Regulation of actin cytoskeleton	RT		15	1.9	0.017	0.088
	KEGG_PATHWAY	Measles	RT		11	1.4	0.018	0.093
	KEGG_PATHWAY	VEGF signaling pathway	RT		7	0.9	0.021	0.11
	KEGG_PATHWAY	Choline metabolism in cancer	RT		9	1.2	0.025	0.12
	KEGG_PATHWAY	Estrogen signaling pathway	RT		9	1.2	0.025	0.12
	KEGG_PATHWAY	Pancreatic cancer	RT		7	0.9	0.033	0.15
	KEGG_PATHWAY	Gap junction	RT		8	1	0.035	0.16
	KEGG_PATHWAY	ErbB signaling pathway	RT		8	1	0.037	0.16
	KEGG_PATHWAY	NOD-like receptor signaling pathway	RT		6	0.8	0.037	0.16
	KEGG_PATHWAY	Viral carcinogenesis	RT		14	1.8	0.04	0.17
	KEGG_PATHWAY	Hepatitis C	RT		10	1.3	0.042	0.17
	KEGG_PATHWAY	RNA degradation	RT		7	0.9	0.052	0.21
	KEGG_PATHWAY	Aldosterone-regulated sodium reabsorption	RT		5	0.6	0.052	0.2
	KEGG_PATHWAY	Ubiquitin mediated proteolysis	RT		10	1.3	0.054	0.21
	KEGG_PATHWAY	Thyroid hormone signaling pathway	RT		9	1.2	0.054	0.2
	KEGG_PATHWAY	PI3K-Akt signaling pathway	RT		19	2.5	0.058	0.21
	KEGG_PATHWAY	Ras signaling pathway	RT		14	1.8	0.059	0.21
	KEGG_PATHWAY	Long-term depression	RT		6	0.8	0.063	0.22
	KEGG_PATHWAY	MicroRNAs in cancer	RT		15	1.9	0.065	0.23
	KEGG_PATHWAY	Dorso-ventral axis formation	RT		4	0.5	0.074	0.25
	KEGG_PATHWAY	Central carbon metabolism in cancer	RT		6	0.8	0.079	0.26
	KEGG_PATHWAY	Spliceosome	RT		9	1.2	0.08	0.26
	KEGG_PATHWAY	Platelet activation	RT		9	1.2	0.08	0.26
	KEGG_PATHWAY	Renin secretion	RT		6	0.8	0.088	0.28
	KEGG_PATHWAY	Cholinergic synapse	RT		8	1	0.095	0.3
	KEGG_PATHWAY	Type II diabetes mellitus	RT		5	0.6	0.097	0.3
from your list are not in the output.

## Sheet: GO_BP_D_DOWN
The Database for Annotation, Visualization and Integrated Discovery	DAVID Bioinformatics Resources 6.8
	Laboratory of Human Retrovirology and Immunoinformatics (LHRI)
*** Welcome to DAVID 6.8 ***
*** If you are looking for DAVID 6.7, please visit our development site. ***
Functional Annotation Chart
Current Gene List: List_1
Current Background: Equus caballus
774 DAVID IDs	Downregulated Genes
Options
110 chart records
Sublist	Category	Term	RT	Genes	Count	%	P-Value	Benjamini
	GOTERM_BP_DIRECT	activation of innate immune response	RT		5	0.6	9.2e-05	0.16
	GOTERM_BP_DIRECT	positive regulation of transcription from RNA polymerase II promoter	RT		45	5.8	9.7e-05	0.09
	GOTERM_BP_DIRECT	peptidyl-serine phosphorylation	RT		16	2.1	0.00014	0.084
	GOTERM_BP_DIRECT	ubiquitin-dependent protein catabolic process	RT		15	1.9	0.00034	0.15
	GOTERM_BP_DIRECT	telomeric 3' overhang formation	RT		4	0.5	0.00051	0.18
	GOTERM_BP_DIRECT	double-strand break repair via nonhomologous end joining	RT		6	0.8	0.00066	0.19
	GOTERM_BP_DIRECT	double-strand break repair via homologous recombination	RT		10	1.3	0.00096	0.24
	GOTERM_BP_DIRECT	telomere maintenance via recombination	RT		5	0.6	0.0011	0.23
	GOTERM_BP_DIRECT	double-strand break repair	RT		9	1.2	0.0011	0.21
	GOTERM_BP_DIRECT	microtubule-based movement	RT		10	1.3	0.0011	0.2
	GOTERM_BP_DIRECT	mitotic G2 DNA damage checkpoint	RT		5	0.6	0.0016	0.25
	GOTERM_BP_DIRECT	cellular response to drug	RT		8	1	0.0017	0.24
	GOTERM_BP_DIRECT	DNA repair	RT		11	1.4	0.0022	0.28
	GOTERM_BP_DIRECT	regulation of establishment of cell polarity	RT		5	0.6	0.0024	0.28
	GOTERM_BP_DIRECT	mitotic cell cycle	RT		6	0.8	0.0028	0.3
	GOTERM_BP_DIRECT	negative regulation of transcription, DNA-templated	RT		20	2.6	0.0036	0.35
	GOTERM_BP_DIRECT	protein localization to centrosome	RT		5	0.6	0.0044	0.4
	GOTERM_BP_DIRECT	cell division	RT		7	0.9	0.0058	0.47
	GOTERM_BP_DIRECT	replication fork processing	RT		5	0.6	0.0074	0.53
	GOTERM_BP_DIRECT	sister chromatid segregation	RT		3	0.4	0.0075	0.52
	GOTERM_BP_DIRECT	negative regulation of neuron apoptotic process	RT		11	1.4	0.0078	0.52
	GOTERM_BP_DIRECT	G2 DNA damage checkpoint	RT		5	0.6	0.0093	0.56
	GOTERM_BP_DIRECT	mitotic spindle assembly	RT		6	0.8	0.011	0.6
	GOTERM_BP_DIRECT	DNA damage checkpoint	RT		5	0.6	0.011	0.61
	GOTERM_BP_DIRECT	mitotic sister chromatid cohesion	RT		4	0.5	0.012	0.61
	GOTERM_BP_DIRECT	positive regulation of glucose import in response to insulin stimulus	RT		4	0.5	0.012	0.61
	GOTERM_BP_DIRECT	regulation of transcription, DNA-templated	RT		29	3.7	0.012	0.6
	GOTERM_BP_DIRECT	postreplication repair	RT		4	0.5	0.016	0.69
	GOTERM_BP_DIRECT	G1/S transition of mitotic cell cycle	RT		7	0.9	0.017	0.69
	GOTERM_BP_DIRECT	negative regulation of BMP signaling pathway	RT		6	0.8	0.019	0.73
	GOTERM_BP_DIRECT	positive regulation of peptidyl-serine phosphorylation	RT		8	1	0.023	0.78
	GOTERM_BP_DIRECT	protection from non-homologous end joining at telomere	RT		3	0.4	0.023	0.77
	GOTERM_BP_DIRECT	positive regulation of DNA-templated transcription, initiation	RT		3	0.4	0.023	0.77
	GOTERM_BP_DIRECT	regulation of protein export from nucleus	RT		3	0.4	0.023	0.77
	GOTERM_BP_DIRECT	negative regulation of telomere capping	RT		3	0.4	0.023	0.77
	GOTERM_BP_DIRECT	telomere capping	RT		3	0.4	0.023	0.77
	GOTERM_BP_DIRECT	protein retention in Golgi apparatus	RT		3	0.4	0.023	0.77
	GOTERM_BP_DIRECT	cell aging	RT		4	0.5	0.026	0.79
	GOTERM_BP_DIRECT	centrosome duplication	RT		4	0.5	0.026	0.79
	GOTERM_BP_DIRECT	intracellular transport	RT		4	0.5	0.031	0.85
	GOTERM_BP_DIRECT	histone H4-K20 trimethylation	RT		3	0.4	0.034	0.86
	GOTERM_BP_DIRECT	V(D)J recombination	RT		3	0.4	0.034	0.86
	GOTERM_BP_DIRECT	3'-UTR-mediated mRNA destabilization	RT		3	0.4	0.034	0.86
	GOTERM_BP_DIRECT	regulation of transcription from RNA polymerase II promoter	RT		17	2.2	0.036	0.87
	GOTERM_BP_DIRECT	cell morphogenesis	RT		7	0.9	0.037	0.87
	GOTERM_BP_DIRECT	protein K48-linked deubiquitination	RT		4	0.5	0.038	0.87
	GOTERM_BP_DIRECT	RNA processing	RT		6	0.8	0.038	0.86
	GOTERM_BP_DIRECT	cellular response to hydrogen peroxide	RT		5	0.6	0.041	0.88
	GOTERM_BP_DIRECT	regulation of autophagy	RT		5	0.6	0.041	0.88
	GOTERM_BP_DIRECT	T cell proliferation	RT		4	0.5	0.045	0.89
	GOTERM_BP_DIRECT	activation of protein kinase activity	RT		4	0.5	0.045	0.89
	GOTERM_BP_DIRECT	androgen receptor signaling pathway	RT		4	0.5	0.045	0.89
	GOTERM_BP_DIRECT	regulation of apoptotic process	RT		11	1.4	0.046	0.89
	GOTERM_BP_DIRECT	regulation of mRNA processing	RT		3	0.4	0.046	0.89
	GOTERM_BP_DIRECT	positive regulation of telomere maintenance	RT		3	0.4	0.046	0.89
	GOTERM_BP_DIRECT	mitotic DNA replication checkpoint	RT		3	0.4	0.046	0.89
	GOTERM_BP_DIRECT	regulation of synaptic transmission, GABAergic	RT		3	0.4	0.046	0.89
	GOTERM_BP_DIRECT	regulation of DNA replication	RT		3	0.4	0.046	0.89
	GOTERM_BP_DIRECT	response to UV	RT		5	0.6	0.046	0.88
	GOTERM_BP_DIRECT	cell proliferation	RT		12	1.6	0.051	0.9
	GOTERM_BP_DIRECT	B cell homeostasis	RT		4	0.5	0.052	0.9
	GOTERM_BP_DIRECT	chromosome segregation	RT		6	0.8	0.056	0.91
	GOTERM_BP_DIRECT	fibroblast growth factor receptor signaling pathway	RT		5	0.6	0.058	0.91
	GOTERM_BP_DIRECT	negative regulation of transcription from RNA polymerase II promoter	RT		26	3.4	0.058	0.91
	GOTERM_BP_DIRECT	protein targeting to vacuole	RT		3	0.4	0.059	0.91
	GOTERM_BP_DIRECT	protein localization to kinetochore	RT		3	0.4	0.059	0.91
	GOTERM_BP_DIRECT	DNA topological change	RT		3	0.4	0.059	0.91
	GOTERM_BP_DIRECT	negative regulation of cyclin-dependent protein serine/threonine kinase activity	RT		4	0.5	0.061	0.91
	GOTERM_BP_DIRECT	protein ubiquitination involved in ubiquitin-dependent protein catabolic process	RT		11	1.4	0.062	0.91
	GOTERM_BP_DIRECT	circadian rhythm	RT		5	0.6	0.064	0.92
	GOTERM_BP_DIRECT	cytoskeleton organization	RT		7	0.9	0.064	0.91
	GOTERM_BP_DIRECT	neuronal stem cell population maintenance	RT		4	0.5	0.069	0.93
	GOTERM_BP_DIRECT	regulation of signal transduction	RT		4	0.5	0.069	0.93
	GOTERM_BP_DIRECT	establishment of mitotic spindle orientation	RT		4	0.5	0.069	0.93
	GOTERM_BP_DIRECT	positive regulation of transcription, DNA-templated	RT		17	2.2	0.07	0.92
	GOTERM_BP_DIRECT	mRNA processing	RT		5	0.6	0.07	0.92
	GOTERM_BP_DIRECT	interstrand cross-link repair	RT		3	0.4	0.073	0.93
	GOTERM_BP_DIRECT	execution phase of apoptosis	RT		3	0.4	0.073	0.93
	GOTERM_BP_DIRECT	regulation of stress fiber assembly	RT		3	0.4	0.073	0.93
	GOTERM_BP_DIRECT	positive regulation of kinase activity	RT		3	0.4	0.073	0.93
	GOTERM_BP_DIRECT	protein import into nucleus	RT		5	0.6	0.077	0.93
	GOTERM_BP_DIRECT	substrate adhesion-dependent cell spreading	RT		5	0.6	0.077	0.93
	GOTERM_BP_DIRECT	negative regulation of viral genome replication	RT		4	0.5	0.079	0.93
	GOTERM_BP_DIRECT	cell migration	RT		10	1.3	0.083	0.94
	GOTERM_BP_DIRECT	hippo signaling	RT		4	0.5	0.088	0.95
	GOTERM_BP_DIRECT	mitotic spindle organization	RT		4	0.5	0.088	0.95
	GOTERM_BP_DIRECT	protein targeting to Golgi	RT		3	0.4	0.089	0.95
	GOTERM_BP_DIRECT	cellular response to glucose stimulus	RT		3	0.4	0.089	0.95
	GOTERM_BP_DIRECT	resolution of meiotic recombination intermediates	RT		3	0.4	0.089	0.95
	GOTERM_BP_DIRECT	positive regulation of protein autophosphorylation	RT		3	0.4	0.089	0.95
	GOTERM_BP_DIRECT	chromatin remodeling	RT		6	0.8	0.089	0.94
	GOTERM_BP_DIRECT	intracellular signal transduction	RT		19	2.5	0.092	0.95
	GOTERM_BP_DIRECT	positive regulation of protein catabolic process	RT		5	0.6	0.092	0.95
	GOTERM_BP_DIRECT	nuclear-transcribed mRNA catabolic process, nonsense-mediated decay	RT		4	0.5	0.099	0.95
	GOTERM_BP_DIRECT	mitotic cytokinesis	RT		4	0.5	0.099	0.95
	GOTERM_BP_DIRECT	DNA replication initiation	RT		4	0.5	0.099	0.95
	GOTERM_BP_DIRECT	positive regulation of telomerase catalytic core complex assembly	RT		2	0.3	0.099	0.95
	GOTERM_BP_DIRECT	negative regulation of integrin activation	RT		2	0.3	0.099	0.95
	GOTERM_BP_DIRECT	establishment of Sertoli cell barrier	RT		2	0.3	0.099	0.95
	GOTERM_BP_DIRECT	insulin receptor signaling pathway via phosphatidylinositol 3-kinase	RT		2	0.3	0.099	0.95
	GOTERM_BP_DIRECT	positive regulation of fever generation	RT		2	0.3	0.099	0.95
	GOTERM_BP_DIRECT	positive regulation of receptor binding	RT		2	0.3	0.099	0.95
	GOTERM_BP_DIRECT	cellular response to UV-C	RT		2	0.3	0.099	0.95
	GOTERM_BP_DIRECT	resolution of recombination intermediates	RT		2	0.3	0.099	0.95
	GOTERM_BP_DIRECT	regulation of double-strand break repair via nonhomologous end joining	RT		2	0.3	0.099	0.95
	GOTERM_BP_DIRECT	Fc-epsilon receptor signaling pathway	RT		2	0.3	0.099	0.95
	GOTERM_BP_DIRECT	negative regulation of chromatin silencing	RT		2	0.3	0.099	0.95
	GOTERM_BP_DIRECT	dendritic cell proliferation	RT		2	0.3	0.099	0.95
	GOTERM_BP_DIRECT	inner cell mass cellular morphogenesis	RT		2	0.3	0.099	0.95
	GOTERM_BP_DIRECT	establishment of RNA localization to telomere	RT		2	0.3	0.099	0.95
